# Supplementary material
Source: publisher figshare collection journal article supplement (https://geolsoc.figshare.com/ndownloader/files/12799139)
Supplement: Supplementary file 1 [file 12799139]

## Sheet: Foglio1
Sample, crystal and core/rim*	CLQT1a-1-1	CLQT1a-1-2	CLQT1a-2-1	CLQT1a-2-2	CLQT1a-3-1	CLQT1a-3-2	CLQT1a-4-1	CLQT1a-4-2	CLQT1a-5-1	CLQT1a-5-2	CLQT1a-6-1	CLQT1a-6-2	CLQT1a-7-1	CLQT1a-7-2	CLQT1a-8-1	CLQT1a-8-2	CLQT1a-9-1	CLQT1a-9-2	CLQT1a-10-1	CLQT1a-10-2	CLQT9b-1-1	CLQT9b-1-2	CLQT9b-2-1	CLQT9b-2-2	CLQT9b-3-1	CLQT9b-3-2	CLQT9b-4-1	CLQT9b-4-2	CLQT9b-5-1	CLQT9b-5-2	CLQT9b-6-1	CLQT9b-6-2	CLQT9b-7-1	CLQT9b-7-2	CLQT9b-8-1	CLQT9b-8-2	CLQT9b-9-1	CLQT9b-9-2	CLQT9b-10-1	CLQT9b-10-2	CLQT13b-1-1	CLQT13b-1-2	CLQT13b-2-1	CLQT13b-2-2	CLQT13b-3-1	CLQT13b-3-2	CLQT13b-4-1	CLQT13b-4-2	CLQT13b-5-1
Locality	Cerro los Quesos																				Cerro los Quesos																				Cerro los Quesos
SiO2	37.48	36.77	37.48	37.27	37.62	36.7	36.74	37.27	37.66	37.05	37.43	37.06	37.28	37.56	37.26	37.28	37.55	37.21	37.31	37.38	38.38	38.52	37.33	37.22	37.97	37.71	29.03	33.99	37.76	38.09	37.1	37.71	33.37	29.73	37.07	38.47	37.27	37.99	37.59	37.82	33.46	33.17	33.2	33.34	33.06	32.61	32.94	33.04	32.51
TiO2	3.53	3.48	3.6	3.68	3.59	3.72	3.7	3.63	3.87	3.62	3.72	3.58	3.4	3.24	3.68	3.74	3.67	3.63	3.66	3.47	4.46	4.34	5.04	4.97	4.56	4.53	3.97	4.41	4.51	4.34	4.59	4.55	4.34	3.82	5.06	5.06	4.87	4.47	4.55	4.51	1.71	1.71	1.0888	0.9176	1.4932	1.4878	0.8899	1.1434	1.76
Al2O3	13.28	13.1	13.29	13.52	13.31	13.27	13.94	13.5	13.51	14.19	13.79	13.52	13.5	13.33	13.39	13.43	13.26	13.72	13.55	13.4	12.55	12.43	14.18	14.38	12.74	12.42	11.74	13.48	13.04	12.57	13.16	13.1	13.34	11.53	14.77	15.14	13.52	12.77	12.93	13.04	17.31	17.46	18.05	18.13	17.78	18.04	17.52	17.89	17.84
FeOT	19.37	19.68	19.51	19.49	19.33	19.78	20.04	19.92	18.75	18.6	19.75	19.48	19.04	18.92	19.62	19.46	19.23	19.45	19.33	19.33	15.4	15.67	11.76	11.8	15.91	15.88	9.77	11.14	15.79	15.67	16.18	16.24	11.6	10.46	11.53	11.56	16.62	15.87	16.09	15.67	32.42	32.15	32.71	33.02	32.39	31.94	31.88	32.46	32.09
MnO	0.4046	0.3729	0.2947	0.3377	0.3487	0.3871	0.2834	0.3916	0.3345	0.3357	0.3792	0.325	0.3186	0.2523	0.3222	0.3458	0.3643	0.3566	0.3475	0.3152	0.454	0.4624	0.1096	0.1043	0.4976	0.4857	0.1028	0.148	0.5829	0.4252	0.4046	0.5422	0.1531	0.1125	0.0524	0.0854	0.5211	0.4496	0.5209	0.4469	0.2398	0.1071	0.0599	0.1928	0.0321	0.1885	0.1907	0.1093	0.0857
MgO	11.43	11.4	11.31	11.53	11.32	11.39	11.46	11.22	12.51	12.69	11.71	11.79	11.54	11.44	11.87	11.78	11.6	11.73	11.42	11.42	14.02	13.89	16.13	16.2	13.76	13.37	13.26	15.19	13.95	13.98	13.56	13.82	14.8	13.5	16.27	16.42	13.13	13.88	13.77	13.61	2.61	2.68	2.65	2.62	2.48	2.73	2.5	2.52	2.52
CaO	0.0093	0.0367	bd	bd	0.0323	0.027	bd	0.0065	bd	bd	bd	0.006	0.0348	0.0351	bd	0.016	0.0093	0.0185	bd	0.0109	0.0606	0.0481	bd	0.0218	0.008	0.0106	0.0702	0.0881	0.0453	0.0568	0.0972	0.0407	0.0857	0.064	0.0571	0.0677	0.0181	0.0198	0.0086	0.0763	0.0077	bd	bd	0.0134	0.0153	0.0542	0.0538	0.0725	bd
Na2O	0.3773	0.2964	0.3751	0.286	0.3664	0.3066	0.3532	0.3095	0.3707	0.3463	0.2936	0.3685	0.3522	0.3672	0.314	0.3808	0.3694	0.364	0.3048	0.3134	0.5676	0.5183	1.1518	1.0959	0.5312	0.5136	0.9586	0.9702	0.4357	0.4871	0.446	0.446	0.8907	0.8893	1.1237	1.1673	0.5502	0.5301	0.4261	0.54	0.2501	0.2565	0.4672	0.4892	0.4926	0.4107	0.4243	0.509	0.5459
K2O	9.26	9.28	9.32	9.14	9.17	9.15	9.15	9.16	9.06	9.21	9.15	9.3	9.18	9.34	9.28	9.23	9.21	9.25	9.19	9.29	8.93	9.01	7.82	7.93	8.97	8.99	6.08	7.17	8.96	8.86	8.73	9.02	7.32	6.46	7.84	8.05	8.94	8.98	8.9	8.79	8.34	8.31	8.58	8.55	8.47	8.5	8.26	8.38	8.29
Cl	0.0675	0.0764	0.0536	0.0413	0.0754	0.0547	0.0469	0.0942	0.0591	0.0552	0.0441	0.0713	0.072	0.0732	0.0447	0.0711	0.0508	0.0442	0.0525	0.0604	0.1549	0.133	0.0457	0.0536	0.1497	0.145	0.0965	0.039	0.1426	0.1584	0.1225	0.1307	0.0541	0.0756	0.055	0.0518	0.1611	0.1496	0.1484	0.1568	0.5416	0.4262	0.6697	0.6681	0.6683	0.651	0.5903	0.6194	0.641
Cr2O3	0.0052	0.0198	0.0191	0.0428	bd	bd	bd	bd	bd	bd	bd	0.029	bd	0.0299	bd	bd	0.0091	0.0506	0.0464	0.0557	0.0797	bd	0.0815	0.0461	0.0199	0.032	bd	bd	bd	bd	0.0223	bd	bd	bd	bd	bd	0.0167	bd	bd	0.0488	0.0415	bd	bd	bd	0.0733	0.0087	bd	0.0255	0.0084
BaO	na	na	na	na	na	na	na	na	na	na	na	na	na	na	na	na	na	na	na	na	na	na	na	na	na	na	na	na	na	na	na	na	na	na	na	na	na	na	na	na	na	na	na	na	na	na	na	na	na
Tot.	95.214	94.5123	95.2571	95.3379	95.1628	94.7855	95.7135	95.5018	96.1244	96.1019	96.267	95.5298	94.7177	94.5878	95.781	95.7337	95.3229	95.824	95.2113	95.0457	95.0569	95.0219	93.6487	93.8218	95.1165	94.0869	75.0782	86.6254	95.2166	94.6375	94.4127	95.5997	85.9537	76.6415	93.8282	96.0723	95.6173	95.1092	94.9341	94.7089	96.9307	96.2699	97.4757	97.9412	96.9549	96.621	95.2491	96.7691	96.291
Si	5.73672	5.69259	5.73703	5.69475	5.75245	5.66347	5.61171	5.69815	5.67949	5.59436	5.66622	5.66184	5.72355	5.77187	5.67651	5.67768	5.73331	5.66125	5.70535	5.7292	5.764	5.79354	5.5655	5.54262	5.71818	5.74758	5.41888	5.49007	5.67894	5.75181	5.6368	5.66223	5.45981	5.46245	5.50856	5.56939	5.60715	5.71897	5.67749	5.70726	5.34015	5.32533	5.27848	5.28147	5.28058	5.22555	5.34869	5.2892	5.22846
Ti	0.406344	0.405183	0.414425	0.422881	0.412842	0.431733	0.425024	0.417385	0.43893	0.41108	0.423518	0.411331	0.392576	0.374448	0.42164	0.428373	0.421422	0.41535	0.420914	0.399981	0.503744	0.490911	0.565109	0.55661	0.516461	0.519257	0.557325	0.535699	0.510114	0.492877	0.524477	0.513804	0.534031	0.527851	0.565485	0.550924	0.55102	0.506071	0.516834	0.511844	0.205248	0.206468	0.130189	0.10932	0.179371	0.1793	0.108673	0.137659	0.212875
Al	2.39635	2.39098	2.39828	2.43545	2.39938	2.41421	2.51019	2.4333	2.402	2.52599	2.46108	2.4351	2.44349	2.41495	2.40495	2.41134	2.38686	2.4609	2.44278	2.42129	2.22203	2.20403	2.49236	2.52456	2.2619	2.23171	2.58356	2.56687	2.31207	2.23778	2.35723	2.31894	2.57315	2.49752	2.58752	2.58404	2.39799	2.26635	2.30234	2.31991	3.25696	3.30471	3.38326	3.3859	3.3481	3.40805	3.35386	3.37635	3.38251
Fe2	2.47953	2.5481	2.49758	2.49059	2.47196	2.55281	2.55994	2.54706	2.36486	2.34882	2.50044	2.48895	2.44473	2.43157	2.49985	2.47864	2.45556	2.47484	2.47209	2.47778	1.93426	1.97107	1.46632	1.46959	2.00384	2.0242	1.52522	1.50483	1.98606	1.97896	2.05595	2.03935	1.58728	1.60731	1.43291	1.39965	2.09117	1.99803	2.03243	1.97765	4.32729	4.31676	4.34937	4.37463	4.32678	4.28047	4.3293	4.34584	4.3162
Mn	0.0524567	0.0489012	0.0382101	0.0437076	0.0451645	0.0506	0.0366663	0.0507141	0.0427304	0.0429363	0.0486243	0.0420578	0.041433	0.0328412	0.0415791	0.0446099	0.0471157	0.0459563	0.0450114	0.0409215	0.0577545	0.0589097	0.013841	0.0131563	0.0634758	0.0627058	0.0162542	0.0202488	0.0742575	0.0543873	0.0520709	0.0689606	0.0212182	0.0175088	0.00659565	0.0104726	0.0664072	0.0573306	0.0666422	0.0571252	0.0324181	0.0145647	0.00806693	0.0258706	0.00434305	0.0255861	0.0262292	0.0148211	0.0116748
Mg	2.60731	2.63029	2.58007	2.62559	2.57966	2.61952	2.60869	2.55652	2.8117	2.85565	2.64187	2.6844	2.64044	2.61998	2.69508	2.67376	2.63958	2.6597	2.60258	2.60857	3.13797	3.11345	3.58395	3.59531	3.08828	3.03698	3.68882	3.6565	3.12674	3.14617	3.07044	3.09258	3.60882	3.69665	3.60317	3.54275	2.94394	3.11401	3.09956	3.06088	0.620797	0.641235	0.627911	0.618546	0.590353	0.651967	0.604986	0.601219	0.604003
Ca	bd	0.00608803	bd	bd	0.00529213	bd	bd	bd	bd	bd	bd	bd	0.00572483	0.00577953	bd	bd	bd	bd	bd	bd	0.00975183	0.0077517	bd	bd	bd	bd	0.0140409	0.0152474	0.00730008	0.00919044	0.0158241	0.00654816	0.0150244	0.0125999	0.00909171	0.0105019	bd	bd	bd	0.0123374	bd	bd	bd	bd	bd	0.00930625	0.00936053	0.012436	bd
Na	0.111974	0.0889736	0.111327	0.0847321	0.108632	0.0917393	0.104603	0.0917492	0.108397	0.101387	0.086178	0.109158	0.104844	0.109411	0.0927545	0.11245	0.10936	0.107379	0.0903729	0.0931366	0.165283	0.151149	0.332958	0.316429	0.155111	0.151782	0.34695	0.303847	0.127054	0.142619	0.131389	0.129847	0.282566	0.316816	0.323767	0.327668	0.160498	0.15473	0.124785	0.158003	0.0773941	0.0798463	0.144026	0.150259	0.15256	0.127606	0.133587	0.157992	0.17023
K	1.80824	1.83293	1.82006	1.78173	1.78889	1.80144	1.78303	1.7867	1.74317	1.7742	1.76716	1.81266	1.7981	1.83113	1.80372	1.7934	1.79406	1.79546	1.79289	1.81657	1.71101	1.72888	1.48742	1.50658	1.72342	1.74811	1.44793	1.4775	1.71919	1.7069	1.69221	1.7279	1.52797	1.51428	1.48632	1.48683	1.71594	1.72467	1.71497	1.6923	1.69815	1.70209	1.74036	1.72797	1.72601	1.73773	1.71114	1.71149	1.70095
Cl	0.0174881	0.0200209	0.0138876	0.0106817	0.0195155	0.0142882	0.0121256	0.0243781	0.0150866	0.0141083	0.0113002	0.0184381	0.0187109	0.0190404	0.0115271	0.018329	0.013129	0.0113828	0.0135891	0.0156699	0.0393772	0.0338597	0.0115328	0.0135107	0.0381604	0.0374085	0.0304904	0.0106626	0.0363019	0.0404877	0.0315042	0.0332185	0.0149828	0.0235119	0.0138341	0.0126937	0.0410254	0.0381201	0.0379395	0.0400522	0.146312	0.115821	0.180229	0.179145	0.180686	0.176578	0.162245	0.16784	0.174497
Cr	bd	bd	bd	0.00517068	bd	bd	bd	bd	bd	bd	bd	bd	bd	bd	bd	bd	bd	0.00608684	0.00561001	0.00674992	0.00946381	bd	0.0096071	0.00542786	bd	bd	bd	bd	bd	bd	bd	bd	bd	bd	bd	bd	bd	bd	bd	0.00582257	0.00523678	bd	bd	bd	0.00925702	bd	bd	bd	bd
Ba	na	na	na	na	na	na	na	na	na	na	na	na	na	na	na	na	na	na	na	na	na	na	na	na	na	na	na	na	na	na	na	na	na	na	na	na	na	na	na	na	na	na	na	na	na	na	na	na	na
sum	15.6186	15.6665	15.6139	15.5953	15.5838	15.6443	15.652	15.607	15.6064	15.6691	15.6064	15.6684	15.6136	15.6147	15.6476	15.6412	15.603	15.6413	15.5912	15.6117	15.5547	15.5535	15.5286	15.5473	15.5725	15.5653	15.6295	15.5815	15.578	15.5612	15.5706	15.5934	15.6248	15.6765	15.5372	15.4949	15.5801	15.5815	15.5744	15.5432	15.7113	15.7068	15.8419	15.8554	15.8007	15.8232	15.7881	15.8181	15.8025
Mgv	0.507328	0.503183	0.504327	0.508846	0.506135	0.501542	0.501161	0.495998	0.538712	0.544202	0.50894	0.514706	0.515047	0.515299	0.514671	0.51448	0.513312	0.513406	0.508348	0.508764	0.611692	0.605325	0.707716	0.708009	0.599016	0.59271	0.70528	0.705673	0.602796	0.607425	0.592925	0.594625	0.691699	0.694667	0.714535	0.715292	0.577072	0.602397	0.596226	0.600683	0.124645	0.128955	0.125951	0.12324	0.119954	0.131497	0.12196	0.121167	0.122469
Table S3. EPMA analyses of biotite phenocrysts of the P2 sequence samples. Oxides are shown as wt%. Mineral formula based on 22 oxygens. Mgv ratio is Mg/(Mg+Fe2+tot+Mn). Abbreviations: bd is below detection; na is not analysed.
*The fisrt number after the name of the sample concerns the phenocryst and the second one points out if core (1) or rim (2) is analysed.
[truncated: 618 more columns]
